# Supplementary material for: Effects of a Four-Week High-Dosage Zinc Oxide Supplemented Diet on Commensal Escherichia coli of Weaned Pigs
Source: Front Microbiol. 2019 Nov 28;10:2734. doi: 10.3389/fmicb.2019.02734 (PMC6892955; doi:10.3389/fmicb.2019.02734)
Supplement: Supplementary file 1 [file Table_1.xlsx]

## Sheet: allresults_centerofgenomicepide
Supplementary Table S1: Metadata of 179 E. coli isolates
Metadata						Sequence types / Serotypes (Center for Genomic Epidemiology)			Antimicrobial resistance genes (Center for Genomic Epidemiology)															Antibiotic resistance profiles	Phenotypic antimicrobial resistance				Zinc homeostasis genes (BLAST based RKI-tool)
Sample_ID	Original-ID	Sampling Site	Feeding group	Pig	ZnCl2-MIC (µg/ml)	Sequence types (ST)	CC	Sero types	aadA1	aadA2	dfrA1	mph(B)	blaTEM-1b	strA	strB	sul1	sul2	sul3	tet(A)	tet(B)	aac(3)-Iva	aph(4)-Ia	cmlA1	Vitek2	AMP	TET	SXT	ERFX	acrD	amtB	aslA	baeSR	emtA	fdnG	hydG	mdtA	mdtB	mdtC	mdtD	ompC	pqqL	ribA	soxR	soxS	spy	ydaE	ydfE	yeiR	yfiK
RKI3885	18-1-1-4-D16_S25CLC	Digesta	CG	1	256	21	ST29 Cplx	O26:H11	0	0	0	0	0	0	0	0	0	0	0	0	0	0	0	Susceptible	0	0	0	0	1	1	0	1	1	1	1	1	1	1	1	1	1	1	1	1	1	1	1	1	1
RKI3886	18-1-1-4-D17_S26CLC	Digesta	CG	1	256	21	ST29 Cplx	O26:H11	0	0	0	0	0	0	0	0	0	0	0	0	0	0	0	Susceptible	0	0	0	0	1	1	0	1	1	1	1	1	1	1	1	1	1	1	1	1	1	1	1	1	1
RKI3887	18-1-1-4-D18_S27CLC	Digesta	CG	1	256	21	ST29 Cplx	O26:H11	0	0	0	0	0	0	0	0	0	0	0	0	0	0	0	Susceptible	0	0	0	0	1	1	0	1	1	1	1	1	1	1	1	1	1	1	1	1	1	1	1	1	1
RKI3888	18-1-1-4-D19_S28CLC	Digesta	CG	1	256	21	ST29 Cplx	O26:H11	0	0	0	0	0	0	0	0	0	0	0	0	0	0	0	Susceptible	0	0	0	0	1	1	0	1	1	1	1	1	1	1	1	1	1	1	1	1	1	1	1	1	1
RKI3873	18-1-1-4-D3_S24CLC	Digesta	CG	1	256	567		O83:H33	1	0	1	1	0	1	1	1	1	0	0	0	0	0	0	SXT	0	0	1	0	1	1	1	1	1	1	1	1	1	1	1	1	2	1	1	1	1	0	1	1	1
RKI3875	18-1-1-4-D5_S21CLC	Digesta	CG	1	256	10	ST10 Cplx	O88:H12	1	0	1	0	1	1	1	0	0	1	1	0	0	0	0	AMP/PIP/TET/SXT	1	1	1	0	1	1	1	1	1	1	1	1	1	1	1	1	1	1	1	1	1	0	1	1	1
RKI3878	18-1-1-4-D8_S22CLC	Digesta	CG	1	256	10	ST10 Cplx	O88:H12	1	0	1	0	1	1	1	0	0	1	1	0	0	0	0	AMP/PIP/TET/SXT	1	1	1	0	1	1	1	1	1	1	1	1	1	1	1	1	1	1	1	1	1	0	1	1	1
RKI3879	18-1-1-4-D9_S23CLC	Digesta	CG	1	256	10	ST10 Cplx	O88:H12	1	0	1	0	1	1	1	0	0	1	1	0	0	0	0	AMP/PIP/TET/SXT	1	1	1	0	1	1	1	1	1	1	1	1	1	1	1	1	1	1	1	1	1	0	1	1	1
RKI3038	18-1-1-4-M10_S1CLC	Mucosa	CG	1	256	21	ST29 Cplx	O26:H11	0	0	0	0	0	0	0	0	0	0	0	0	0	0	0	Susceptible	0	0	0	0	1	1	0	1	1	1	1	1	1	1	1	1	1	1	1	1	1	1	1	1	1
RKI3041	18-1-1-4-M13_S2CLC	Mucosa	CG	1	256	21	ST29 Cplx	O26:H11	0	0	0	0	0	0	0	0	0	0	0	0	0	0	0	Susceptible	0	0	0	0	1	1	0	1	1	1	1	1	1	1	1	1	1	1	1	1	1	1	1	1	1
RKI3046	18-1-1-4-M18_S3CLC	Mucosa	CG	1	256	21	ST29 Cplx	O26:H11	0	0	0	0	0	0	0	0	0	0	0	0	0	0	0	Susceptible	0	0	0	0	1	1	0	1	1	1	1	1	1	1	1	1	1	1	1	1	1	1	1	1	1
RKI3048	18-1-1-4-M20_S4CLC	Mucosa	CG	1	256	21	ST29 Cplx	O26:H11	0	0	0	0	0	0	0	0	0	0	0	0	0	0	0	Susceptible	0	0	0	0	1	1	0	1	1	1	1	1	1	1	1	1	1	1	1	1	1	1	1	1	1
RKI3049	18-1-1-4-M21_S5CLC	Mucosa	CG	1	256	21	ST29 Cplx	O26:H11	0	0	0	0	0	0	0	0	0	0	0	0	0	0	0	Susceptible	0	0	0	0	1	1	0	1	1	1	1	1	1	1	1	1	1	1	1	1	1	1	1	1	1
RKI4667	18-1-31-3-K1_S29CLC	Feces	CG	1	256	10	ST10 Cplx	O88:H12	1	0	1	0	1	1	1	0	0	1	1	0	0	0	0	AMP/PIP/TET/SXT	1	1	1	0	1	1	1	1	1	1	1	1	1	1	1	1	1	1	1	1	1	0	1	1	1
RKI4682	18-1-31-3-K16_S25CLC	Feces	CG	1	256	218	ST10 Cplx	O157:H43	0	0	0	0	0	0	0	0	0	0	0	0	0	0	0	Susceptible	0	0	0	0	1	1	2	1	1	1	1	1	1	1	1	1	1	1	1	1	1	0	1	1	1
RKI4683	18-1-31-3-K17_S26CLC	Feces	CG	1	256	218	ST10 Cplx	O157:H43	0	0	0	0	0	0	0	0	0	0	0	0	0	0	0	Susceptible	0	0	0	0	1	1	2	1	1	1	1	1	1	1	1	1	1	1	1	1	1	0	1	1	1
RKI4685	18-1-31-3-K19_S27CLC	Feces	CG	1	256	218	ST10 Cplx	O157:H43	0	0	0	0	0	0	0	0	0	0	0	0	0	0	0	Susceptible	0	0	0	0	1	1	2	1	1	1	1	1	1	1	1	1	1	1	1	1	1	0	1	1	1
RKI4671	18-1-31-3-K5_S30CLC.	Feces	CG	1	256	10	ST10 Cplx	O88:H12	1	0	1	0	1	1	1	0	0	1	1	0	0	0	0	AMP/PIP/TET/SXT	1	1	1	0	1	1	1	1	1	1	1	1	1	1	1	1	1	1	1	1	1	0	1	1	1
RKI4673	18-1-31-3-K7_S31CLC	Feces	CG	1	256	10	ST10 Cplx	O88:H12	1	0	0	0	0	0	0	0	0	0	0	0	0	0	0	AMP/PIP/TET/SXT	1	1	1	0	1	1	1	1	1	1	1	1	1	1	1	1	1	1	1	1	1	0	1	1	1
RKI3905	18-4-1-4-D14_S29CLC	Digesta	CG	2	256	88	ST23 Cplx	O8:H9	0	0	0	0	0	0	0	0	0	0	0	0	0	0	0	Susceptible	0	0	0	0	1	1	1	1	1	1	1	1	1	1	1	1	1	1	1	1	1	0	1	1	1
RKI3906	18-4-1-4-D15_S30CLC	Digesta	CG	2	256	218	ST10 Cplx	O157:H43	0	0	0	0	0	0	0	0	0	0	0	0	0	0	0	Susceptible	0	0	0	0	1	1	2	1	1	1	1	1	1	1	1	1	1	1	1	1	1	0	1	1	1
RKI3060	18-4-1-4-M12_S7CLC	Mucosa	CG	2	256	218	ST10 Cplx	O unknown:H43	0	0	0	0	0	0	0	0	0	0	0	0	0	0	0	Susceptible	0	0	0	0	1	1	2	1	1	1	1	1	1	1	1	1	1	1	1	1	1	0	1	1	1
RKI3066	18-4-1-4-M18_S8CLC	Mucosa	CG	2	256	88	ST23 Cplx	O8:H9	0	0	0	0	0	0	0	0	0	0	0	0	0	0	0	Susceptible	0	0	0	0	1	1	1	1	1	1	1	1	1	1	1	1	1	1	1	1	1	0	1	1	1
RKI3056	18-4-1-4-M6_S6CLC	Mucosa	CG	2	256	88	ST23 Cplx	O8:H9	0	0	0	0	0	0	0	0	0	0	0	0	0	0	0	Susceptible	0	0	0	0	1	1	1	1	1	1	1	1	1	1	1	1	1	1	1	1	1	0	1	1	1
RKI4697	18-4-31-3-K10_S29CLC	Feces	CG	2	256	218	ST10 Cplx	O157:H43	0	0	0	0	0	0	0	0	0	0	0	0	0	0	0	Susceptible	0	0	0	0	1	1	1	1	1	1	1	1	1	1	1	1	1	1	1	1	1	0	1	1	1
RKI4705	18-4-31-3-K18_S1CLC	Feces	CG	2	256	218	ST10 Cplx	O157:H43	0	0	0	0	0	0	0	0	0	0	0	0	0	0	0	Susceptible	0	0	0	0	1	1	1	1	1	1	1	1	1	1	1	1	1	1	1	1	1	0	1	1	1
RKI4707	18-4-31-3-K20_S2CLC	Feces	CG	2	128	34	ST10 Cplx	O92:H2	1	0	0	0	0	0	0	0	0	0	0	0	0	0	0	Susceptible	0	0	0	0	1	1	1	1	1	1	1	1	1	1	1	1	2	1	1	1	1	0	1	1	1
RKI4708	18-4-31-3-K21_S3CLC	Feces	CG	2	256	218	ST10 Cplx	O157:H43	0	0	0	0	0	0	0	0	0	0	0	0	0	0	0	Susceptible	0	0	0	0	1	1	2	1	1	1	1	1	1	1	1	1	1	1	1	1	1	0	1	1	1
RKI4696	18-4-31-3-K9_S28CLC	Feces	CG	2	128	34	ST10 Cplx	O92:H2	1	0	0	0	0	0	0	0	0	0	0	0	0	0	0	Susceptible	0	0	0	0	1	1	1	1	1	1	1	1	1	1	1	1	2	1	1	1	1	0	1	1	1
RKI3923	20-1-1-4-D13_S31CLC	Digesta	CG	3	256	1040		O177:H45	0	0	0	0	0	0	0	0	0	0	0	0	0	0	0	Susceptible	0	0	0	0	1	1	1	1	1	1	1	1	1	1	1	1	1	1	1	1	1	0	1	1	1
RKI3925	20-1-1-4-D15_S32CLC	Digesta	CG	3	128	10	ST10 Cplx	O36:H19	0	0	0	0	0	0	0	0	0	0	0	0	0	0	0	Susceptible	0	0	0	0	1	1	1	1	1	1	1	1	1	1	1	1	1	1	1	1	1	0	1	1	1
RKI3920	20-1-1-4-D8_S13CLC	Digesta	CG	3	128	10	ST10 Cplx	O36:H19	0	0	0	0	0	0	0	0	0	0	0	0	0	0	0	Susceptible	0	0	0	0	1	1	1	1	1	1	1	1	1	1	1	1	1	1	1	1	1	0	1	1	1
RKI3131	20-1-1-4-M18_S9CLC	Mucosa	CG	3	256	3057		O98:H5	0	0	0	0	0	0	0	0	0	0	0	0	0	0	0	Susceptible	0	0	0	0	1	1	0	1	1	1	1	1	1	1	1	1	1	1	1	1	1	0	1	1	1
RKI3123	20-1-1-4-M2_S8CLC	Mucosa	CG	3	256	34	ST10 Cplx	O62:H?	0	0	0	0	1	1	1	0	0	0	0	1	0	0	0	AMP/PIP/TET	1	1	0	0	1	1	1	1	1	1	1	1	1	1	1	1	2	1	1	1	1	0	1	1	1
RKI4056	20-12-2-4-D18_S17CLC	Digesta	CG	5	128	10	ST10 Cplx	O36:H19	0	0	0	0	0	0	0	0	0	0	0	0	0	0	0	Susceptible	0	0	0	0	1	1	1	1	1	1	1	1	1	1	1	1	1	1	1	1	1	0	1	1	1
RKI4046	20-12-2-4-D3_S24CLC	Digesta	CG	5	256	34	ST10 Cplx	O62:H30	0	0	0	0	1	1	1	0	0	0	0	1	0	0	0	AMP/PIP/TET	1	1	0	0	1	1	1	1	1	1	1	1	1	1	1	1	2	1	1	1	1	0	1	1	1
RKI4049	20-12-2-4-D7_S16CLC	Digesta	CG	5	256	10	ST10 Cplx	O36:H19	0	0	0	0	0	0	0	0	0	0	0	0	0	0	0	Susceptible	0	0	0	0	1	1	1	1	1	1	1	1	1	1	1	1	1	1	1	1	1	0	1	1	1
RKI3266	20-12-2-4-M20_S13CLC	Mucosa	CG	5	256	1040		O177:H45	0	0	0	0	0	0	0	0	0	0	0	0	0	0	0	Susceptible	0	0	0	0	1	1	1	1	1	1	1	1	1	1	1	1	1	1	1	1	1	0	1	1	1
RKI4972	20-12-31-3-K1_S23CLC	Feces	CG	5	256	34	ST10 Cplx	O62:H30	0	0	0	0	1	1	1	0	0	0	0	1	0	0	0	AMP/PIP/TET	1	1	0	0	1	1	1	1	1	1	1	1	1	1	1	1	2	1	1	1	1	0	1	1	1
RKI6205	20-12-31-3-K15_S24CLC	Feces	CG	5	256	58	ST155 Cplx	O117:H9	0	0	0	0	0	1	1	0	0	0	0	0	0	0	0	Susceptible	0	0	0	0	1	1	0	1	1	1	1	1	1	1	1	1	1	1	1	1	1	0	1	1	1
RKI4968	20-12-31-3-K3_S24CLC	Feces	CG	5	256	34	ST10 Cplx	O62:H30	0	0	0	0	1	1	1	0	0	0	0	1	0	0	0	AMP/PIP/TET	1	1	0	0	1	1	1	1	1	1	1	1	1	1	1	1	2	1	1	1	1	0	1	1	1
RKI4969	20-12-31-3-K4_S15CLC	Feces	CG	5	256	34	ST10 Cplx	O62:H30	0	0	0	0	1	1	1	0	0	0	0	1	0	0	0	AMP/PIP/TET	1	1	0	0	1	1	1	1	1	1	1	1	1	1	1	1	2	1	1	1	1	0	1	1	1
RKI6206	20-12-31-3-K6_S22CLC	Feces	CG	5	256	58	ST155 Cplx	O117:H9	0	0	0	0	0	1	1	0	0	0	0	0	0	0	0	Susceptible	0	0	0	0	1	1	0	1	1	1	1	1	1	1	1	1	1	1	1	1	1	0	1	1	1
RKI6207	20-12-31-3-K8_S23CLC	Feces	CG	5	256	58	ST155 Cplx	O117:H9	0	0	0	0	0	1	1	0	0	0	0	0	0	0	0	Susceptible	0	0	0	0	1	1	0	1	1	1	1	1	1	1	1	1	1	1	1	1	1	0	1	1	1
RKI4784	20-1-31-3-K1_S18CLC	Feces	CG	3	256	34	ST10 Cplx	O62:H30	0	0	0	0	1	1	1	0	0	0	0	1	0	0	0	AMP/PIP/TET	1	1	0	0	1	1	1	1	1	1	1	1	1	1	1	1	2	1	1	1	1	0	1	1	1
RKI4785	20-1-31-3-K10_S22CLC	Feces	CG	3	256	34	ST10 Cplx	O62:H30	0	0	0	0	1	1	1	0	0	0	0	1	0	0	0	AMP/PIP/TET	1	1	0	0	1	1	1	1	1	1	1	1	1	1	1	1	2	1	1	1	1	0	1	1	1
RKI6208	20-1-31-3-K11_S19CLC	Feces	CG	3	256	3057		O98:H5	0	0	0	0	0	0	0	0	0	0	0	0	0	0	0	Susceptible	0	0	0	0	1	1	0	1	1	1	1	1	1	1	1	1	1	1	1	1	1	0	1	1	1
RKI6209	20-1-31-3-K20_S20CLC	Feces	CG	3	256	3057		O98:H5	0	0	0	0	0	0	0	0	0	0	0	0	0	0	0	Susceptible	0	0	0	0	1	1	0	1	1	1	1	1	1	1	1	1	1	1	1	1	1	0	1	1	1
RKI4777	20-1-31-3-K3_S19CLC	Feces	CG	3	256	34	ST10 Cplx	O62:H30	0	0	0	0	1	1	1	0	0	0	0	1	0	0	0	AMP/PIP/TET	1	1	0	0	1	1	1	1	1	1	1	1	1	1	1	1	2	1	1	1	1	0	1	1	1
RKI4782	20-1-31-3-K8_S20CLC	Feces	CG	3	256	34	ST10 Cplx	O62:H30	0	0	0	0	1	1	1	0	0	0	0	1	0	0	0	AMP/PIP/TET	1	1	0	0	1	1	1	1	1	1	1	1	1	1	1	1	2	1	1	1	1	0	1	1	1
RKI4783	20-1-31-3-K9_S21CLC	Feces	CG	3	256	34	ST10 Cplx	O62:H30	0	0	0	0	1	1	1	0	0	0	0	1	0	0	0	AMP/PIP/TET	1	1	0	0	1	1	1	1	1	1	1	1	1	1	1	1	2	1	1	1	1	0	1	1	1
RKI3798	20-3-1-4-D10_S28CLC.	Digesta	HZG	4	512	681		O8:H10	0	0	0	0	0	0	0	0	0	0	0	0	0	0	0	Susceptible	0	0	0	0	1	1	1	1	1	1	1	1	1	1	1	1	2	1	1	1	1	0	1	1	1
RKI3799	20-3-1-4-D14_S29CLC	Digesta	HZG	4	256	23	ST23 Cplx	O78:H9	0	0	0	0	0	0	0	0	0	0	0	0	0	0	0	Susceptible	0	0	0	0	1	1	1	1	1	1	1	1	1	1	1	1	1	1	1	1	1	0	1	1	1
RKI3800	20-3-1-4-D15_S30CLC	Digesta	HZG	4	256	23	ST23 Cplx	O78:H9	0	0	0	0	0	0	0	0	0	0	0	0	0	0	0	Susceptible	0	0	0	0	1	1	1	1	1	1	1	1	1	1	1	1	1	1	1	1	1	0	1	1	1
RKI3802	20-3-1-4-D17_S31CLC	Digesta	HZG	4	512	2946		O109:H48	0	0	0	0	0	0	0	0	0	0	0	0	0	0	0	Susceptible	0	0	0	0	1	1	1	1	1	1	1	1	1	1	1	1	1	1	1	1	1	0	1	1	1
RKI3794	20-3-1-4-D4_S11CLC	Digesta	HZG	4	512	10	ST10 Cplx	O182:H19	1	0	1	0	0	0	0	1	0	1	1	0	0	0	0	TET/SXT	0	1	1	0	1	1	1	1	1	1	2	1	1	1	1	1	1	1	1	1	1	1	1	1	1
RKI3797	20-3-1-4-D7_S12CLC	Digesta	HZG	4	512	10	ST10 Cplx	O182:H19	1	0	1	0	0	0	0	1	0	1	1	0	0	0	0	TET/SXT	0	1	1	0	1	1	1	1	1	1	2	1	1	1	1	1	1	1	1	1	1	1	1	1	1
RKI3076	20-3-1-4-M1_S29CLC	Mucosa	HZG	4	512	10	ST10 Cplx	O182:H19	1	0	1	0	0	0	0	1	0	1	1	0	0	0	0	TET/SXT	0	1	1	0	1	1	1	1	1	1	2	1	1	1	1	1	1	1	1	1	1	1	1	1	1
RKI3080	20-3-1-4-M12_S13CLC	Mucosa	HZG	4	256	23	ST23 Cplx	O78:H9	0	0	0	0	0	0	0	0	0	0	0	0	0	0	0	Susceptible	0	0	0	0	1	1	1	1	1	1	1	1	1	1	1	1	1	1	1	1	1	0	1	1	1
RKI3082	20-3-1-4-M16_S14CLC	Mucosa	HZG	4	256	681		O8:H10	0	0	0	0	0	0	0	0	0	0	0	0	0	0	0	Susceptible	0	0	0	0	1	1	1	1	1	1	1	1	1	1	1	1	2	1	1	1	1	0	1	1	1
RKI3077	20-3-1-4-M9_S13CLC	Mucosa	HZG	4	512	10	ST10 Cplx	O182:H19	1	0	1	0	0	0	0	1	0	1	1	0	0	0	0	TET/SXT	0	1	1	0	1	1	1	1	1	1	2	1	1	1	1	1	1	1	1	1	1	1	1	1	1
RKI4723	20-3-31-3-K10_S18CLC	Feces	HZG	4	512	10	ST10 Cplx	O182:H19	1	0	1	0	0	0	0	1	0	1	1	0	0	0	0	TET/SXT	0	1	1	0	1	1	1	1	1	1	2	1	1	1	1	1	1	1	1	1	1	1	1	1	1
RKI4728	20-3-31-3-K15_S18CLC	Feces	HZG	4	512	10	ST10 Cplx	O182:H19	1	0	1	0	0	0	0	1	0	1	1	0	0	0	0	TET/SXT	0	1	1	0	1	1	1	1	1	1	2	1	1	1	1	1	1	1	1	1	1	1	1	1	1
RKI4729	20-3-31-3-K16_S26CLC	Feces	HZG	4	512	2946		O109:H48	0	0	0	0	0	0	0	0	0	0	0	0	0	0	0	Susceptible	0	0	0	0	1	1	1	1	1	1	1	1	1	1	1	1	1	1	1	1	1	0	1	1	1
RKI4730	20-3-31-3-K17_S19CLC	Feces	HZG	4	512	10	ST10 Cplx	O182:H19	1	0	1	0	0	0	0	1	0	1	1	0	0	0	0	TET/SXT	0	1	1	0	1	1	1	1	1	1	2	1	1	1	1	1	1	1	1	1	1	1	1	1	1
RKI4715	20-3-31-3-K2_S15CLC	Feces	HZG	4	512	10	ST10 Cplx	O182:H19	1	0	1	0	0	0	0	1	0	1	1	0	0	0	0	TET/SXT	0	1	1	0	1	1	1	1	1	1	2	1	1	1	1	1	1	1	1	1	1	1	1	1	1
RKI4716	20-3-31-3-K3_S16CLC	Feces	HZG	4	512	10	ST10 Cplx	O182:H19	1	0	1	0	0	0	0	1	0	1	1	0	0	0	0	TET/SXT	0	1	1	0	1	1	1	1	1	1	2	1	1	1	1	1	1	1	1	1	1	1	1	1	1
RKI4722	20-3-31-3-K9_S17CLC	Feces	HZG	4	512	10	ST10 Cplx	O182:H19	1	0	1	0	0	0	0	1	0	1	1	0	0	0	0	TET/SXT	0	1	1	0	1	1	1	1	1	1	2	1	1	1	1	1	1	1	1	1	1	1	1	1	1
RKI4755	22-2-31-3-K21_S13CLC	Feces	HZG	6	256	40	ST40 Cplx	O39:H21	0	0	0	0	0	0	0	0	0	0	0	0	0	0	0	Susceptible	0	0	0	0	1	1	0	1	1	1	1	1	1	1	1	1	1	1	1	1	1	0	1	1	1
RKI4756	22-2-31-3-K22_S14CLC	Feces	HZG	6	256	40	ST40 Cplx	O39:H21	0	0	0	0	0	0	0	0	0	0	0	0	0	0	0	Susceptible	0	0	0	0	1	1	0	1	1	1	1	1	1	1	1	1	1	1	1	1	1	0	1	1	1
RKI4737	22-2-31-3-K3_S11CLC	Feces	HZG	6	256	40	ST40 Cplx	O39:H21	0	0	0	0	0	0	0	0	0	0	0	0	0	0	0	Susceptible	0	0	0	0	1	1	0	1	1	1	1	1	1	1	1	1	1	1	1	1	1	0	1	1	1
RKI4740	22-2-31-3-K6_S12CLC	Feces	HZG	6	256	40	ST40 Cplx	O39:H21	0	0	0	0	0	0	0	0	0	0	0	0	0	0	0	Susceptible	0	0	0	0	1	1	0	1	1	1	1	1	1	1	1	1	1	1	1	1	1	0	1	1	1
RKI4177	22-2-3-4-D11_S10CLC	Digesta	HZG	6	512	4577		O8:H8	0	0	0	0	0	0	0	0	0	0	0	0	0	0	0	Susceptible	0	0	0	0	1	1	1	1	1	1	1	1	1	1	1	1	1	1	1	1	1	0	1	1	1
RKI4170	22-2-3-4-D2_S9CLC	Digesta	HZG	6	512	4577		O8:H8	0	0	0	0	0	0	0	0	0	0	0	0	0	0	0	Susceptible	0	0	0	0	1	1	1	1	1	1	1	1	1	1	1	1	1	1	1	1	1	0	1	1	1
RKI3382	22-2-3-4-M15_S28CLC	Mucosa	HZG	6	512	4577		O8:H8	0	0	0	0	0	0	0	0	0	0	0	0	0	0	0	Susceptible	0	0	0	0	1	1	1	1	1	1	1	1	1	1	1	1	1	1	1	1	1	0	1	1	1
RKI3376	22-2-3-4-M9_S27CLC	Mucosa	HZG	6	512	4577		O8:H8	0	0	0	0	0	0	0	0	0	0	0	0	0	0	0	Susceptible	0	0	0	0	1	1	1	1	1	1	1	1	1	1	1	1	1	1	1	1	1	0	1	1	1
RKI3828	22-5-1-4-D16_S17CLC	Digesta	HZG	7	512	10	ST10 Cplx	O182:H19	1	0	1	0	0	0	0	1	0	1	1	0	0	0	0	TET/SXT	0	1	1	0	1	1	1	1	1	1	2	1	1	1	1	1	1	1	1	1	1	1	1	1	1
RKI3829	22-5-1-4-D17_S32CLC	Digesta	HZG	7	512	10	ST10 Cplx	O182:H19	1	0	1	0	0	0	0	1	0	1	1	0	0	0	0	TET/SXT	0	1	1	0	1	1	1	1	1	1	2	1	1	1	1	1	1	1	1	1	1	1	1	1	1
RKI3818	22-5-1-4-D2_S13CLC	Digesta	HZG	7	256	34	ST10 Cplx	O62:H30	0	0	0	0	1	1	1	0	0	0	0	1	0	0	0	AMP/PIP/TET	1	1	0	0	1	1	1	1	1	1	1	1	1	1	1	1	2	1	1	1	1	0	1	1	1
RKI3820	22-5-1-4-D6_S14CLC	Digesta	HZG	7	512	10	ST10 Cplx	O182:H19	1	0	1	0	0	0	0	1	0	1	1	0	0	0	0	TET/SXT	0	1	1	0	1	1	1	1	1	1	2	1	1	1	1	1	1	1	1	1	1	1	1	1	1
RKI3821	22-5-1-4-D7_S15CLC	Digesta	HZG	7	512	10	ST10 Cplx	O182:H19	1	0	1	0	0	0	0	1	0	1	1	0	0	0	0	TET/SXT	0	1	1	0	1	1	1	1	1	1	2	1	1	1	1	1	1	1	1	1	1	1	1	1	1
RKI3822	22-5-1-4-D8_S16CLC	Digesta	HZG	7	512	10	ST10 Cplx	O182:H19	1	0	1	0	0	0	0	1	0	1	1	0	0	0	0	TET/SXT	0	1	1	0	1	1	1	1	1	1	2	1	1	1	1	1	1	1	1	1	1	1	1	1	1
RKI3103	22-5-1-4-M11_S15CLC	Mucosa	HZG	7	256	34	ST10 Cplx	O62:H30	0	0	0	0	1	1	1	0	0	0	0	1	0	0	0	AMP/PIP/TET	1	1	0	0	1	1	1	1	1	1	1	1	1	1	1	1	2	1	1	1	1	0	1	1	1
RKI3105	22-5-1-4-M13_S16CLC	Mucosa	HZG	7	256	1308		O unknown:H7	1	0	1	1	0	0	0	1	0	0	1	0	0	0	0	TET/SXT	0	1	1	0	1	1	0	1	1	1	1	1	1	1	1	1	1	1	1	1	1	0	1	1	1
RKI3106	22-5-1-4-M14_S17CLC	Mucosa	HZG	7	512	10	ST10 Cplx	O182:H19	1	0	1	0	0	0	0	1	0	1	1	0	0	0	0	TET/SXT	0	1	1	0	1	1	1	1	1	1	2	1	1	1	1	1	1	1	1	1	1	1	1	1	1
RKI3107	22-5-1-4-M15_S18CLC	Mucosa	HZG	7	512	10	ST10 Cplx	O182:H19	1	0	1	0	0	0	0	1	0	1	1	0	0	0	0	TET/SXT	0	1	1	0	1	1	1	1	1	1	2	1	1	1	1	1	1	1	1	1	1	1	1	1	1
RKI3108	22-5-1-4-M16_S15CLC	Mucosa	HZG	7	256	58	ST155 Cplx	O8:H25	0	0	0	0	0	0	0	0	0	0	0	0	0	0	0	Susceptible	0	0	0	0	1	1	0	1	1	1	1	1	1	1	1	1	1	1	1	1	1	0	1	1	1
RKI3097	22-5-1-4-M3_S2CLC	Mucosa	HZG	7	128	34	ST10 Cplx	O62:H30	0	0	0	0	1	1	1	0	0	0	0	1	0	0	0	AMP/PIP/TET	1	1	0	0	1	1	1	1	1	1	1	1	1	1	1	1	2	1	1	1	1	0	1	1	1
RKI3099	22-5-1-4-M7_S14CLC	Mucosa	HZG	7	512	10	ST10 Cplx	O182:H19	1	0	1	0	0	0	0	1	0	1	1	0	0	0	0	TET/SXT	0	1	1	0	1	1	1	1	1	1	2	1	1	1	1	1	1	1	1	1	1	1	1	1	1
RKI4766	22-5-31-3-K10_S27CLC	Feces	HZG	7	256	1607		O unknown:H49	1	0	0	0	0	0	0	1	0	0	0	0	0	0	0	Susceptible	0	0	0	0	1	1	1	1	1	1	1	1	1	1	1	1	1	1	1	1	1	0	1	1	1
RKI4769	22-5-31-3-K13_S28CLC	Feces	HZG	7	256	1607		O unknown:H49	1	0	0	0	0	0	0	1	0	0	0	0	0	0	0	Susceptible	0	0	0	0	1	1	1	1	1	1	1	1	1	1	1	1	1	1	1	1	1	0	1	1	1
RKI4758	22-5-31-3-K2_S20CLC	Feces	HZG	7	256	1607		O unknown:H49	1	0	0	0	0	0	0	1	0	0	0	0	0	0	0	Susceptible	0	0	0	0	1	1	1	1	1	1	1	1	1	1	1	1	1	1	1	1	1	0	1	1	1
RKI3982	22-6-2-4-D20_S15CLC	Digesta	CG	8	512	4577		O8:H8	0	0	0	0	0	0	0	0	0	0	0	0	0	0	0	Susceptible	0	0	0	0	1	1	1	1	1	1	1	1	1	1	1	1	1	1	1	1	1	0	1	1	1
RKI3972	22-6-2-4-D6_S14CLC	Digesta	CG	8	512	4577		O8:H8	0	0	0	0	0	0	0	0	0	0	0	0	0	0	0	Susceptible	0	0	0	0	1	1	1	1	1	1	1	1	1	1	1	1	1	1	1	1	1	0	1	1	1
RKI3177	22-6-2-4-M1_S10CLC	Mucosa	CG	8	256	34	ST10 Cplx	O62:H30	0	0	0	0	1	1	1	0	0	0	0	1	0	0	0	AMP/PIP/TET	1	1	0	0	1	1	1	1	1	1	1	1	1	1	1	1	2	1	1	1	1	0	1	1	1
RKI3183	22-6-2-4-M12_S12CLC	Mucosa	CG	8	256	1308		O unknown:H7	1	0	1	1	0	0	0	1	0	0	1	0	0	0	0	TET/SXT	0	1	1	0	1	1	0	1	1	1	1	1	1	1	1	1	1	1	1	1	1	0	1	1	1
RKI3178	22-6-2-4-M2_S10CLC	Mucosa	CG	8	256	34	ST10 Cplx	O62:H30	0	0	0	0	1	1	1	0	0	0	0	1	0	0	0	AMP/PIP/TET	1	1	0	0	1	1	1	1	1	1	1	1	1	1	1	1	2	1	1	1	1	0	1	1	1
RKI3179	22-6-2-4-M3_S11CLC	Mucosa	CG	8	256	34	ST10 Cplx	O62:H30	0	0	0	0	1	1	1	0	0	0	0	1	0	0	0	AMP/PIP/TET	1	1	0	0	1	1	1	1	1	1	1	1	1	1	1	1	2	1	1	1	1	0	1	1	1
RKI3181	22-6-2-4-M6_S12CLC	Mucosa	CG	8	256	10	ST10 Cplx	O149:H12	1	0	0	0	0	0	0	1	0	0	0	0	0	0	0	Susceptible	0	0	0	0	1	1	1	1	1	1	1	1	1	1	1	1	1	1	1	1	1	0	1	1	1
RKI4932	22-7-31-3-K10_S26CLC	Feces	CG	9	256	23	ST23 Cplx	O8:H9	0	0	0	0	0	0	0	0	0	0	0	0	0	0	0	Susceptible	0	0	0	0	1	1	2	1	1	1	1	1	1	1	1	1	1	1	1	1	1	0	1	1	1
RKI6210	22-7-31-3-K19_S27CLC	Feces	CG	9	256	23	ST23 Cplx	O8:H9	0	0	0	0	0	0	0	0	0	0	0	0	0	0	0	Susceptible	0	0	0	0	1	1	2	1	1	1	1	1	1	1	1	1	1	1	1	1	1	0	1	1	1
RKI6211	22-7-31-3-K2_S25CLC	Feces	CG	9	256	34	ST10 Cplx	O62:H30	0	0	0	0	1	1	1	0	0	0	0	1	0	0	0	AMP/PIP/TET	1	1	0	0	1	1	1	1	1	1	1	1	1	1	1	1	2	1	1	1	1	0	1	1	1
RKI6212	22-7-31-3-K22_S28CLC	Feces	CG	9	256	23	ST23 Cplx	O8:H9	0	0	0	0	0	0	0	0	0	0	0	0	0	0	0	Susceptible	0	0	0	0	1	1	2	1	1	1	1	1	1	1	1	1	1	1	1	1	1	0	1	1	1
RKI4120	22-7-3-4-D1_S25CLC	Digesta	CG	9	256	34	ST10 Cplx	O62:H30	0	0	0	0	1	1	1	0	0	0	0	1	0	0	0	AMP/PIP/TET	1	1	0	0	1	1	1	1	1	1	1	1	1	1	1	1	2	1	1	1	1	0	1	1	1
RKI4137	22-7-3-4-D21_S19CLC	Digesta	CG	9	256	993		O100:H30	0	0	0	0	0	0	0	0	0	0	0	1	0	0	0	TET	0	1	0	0	1	1	0	1	1	1	1	1	1	1	1	1	1	1	1	1	1	0	1	1	1
RKI4138	22-7-3-4-D22_S20CLC	Digesta	CG	9	256	23	ST23 Cplx	O8:H9	0	0	0	0	0	0	0	0	0	0	0	0	0	0	0	Susceptible	0	0	0	0	1	1	2	1	1	1	1	1	1	1	1	1	1	1	1	1	1	0	1	1	1
RKI4122	22-7-3-4-D3_S26CLC	Digesta	CG	9	256	34	ST10 Cplx	O62:H30	0	0	0	0	1	1	1	0	0	0	0	1	0	0	0	AMP/PIP/TET	1	1	0	0	1	1	1	1	1	1	1	1	1	1	1	1	2	1	1	1	1	0	1	1	1
RKI4124	22-7-3-4-D5_S27CLC	Digesta	CG	9	256	10	ST10 Cplx	O88:H12	1	0	1	0	1	1	1	0	0	1	1	0	0	0	0	AMP/PIP/TET/SXT	1	1	1	0	1	1	1	1	1	1	1	1	1	1	1	1	1	1	1	1	1	0	1	1	1
RKI3307	22-7-3-4-M10_S7CLC	Mucosa	CG	9	256	993		O100:H30	0	0	0	0	0	0	0	0	0	0	0	1	0	0	0	TET	0	1	0	0	1	1	0	1	1	1	1	1	1	1	1	1	1	1	1	1	1	0	1	1	1
RKI3302	22-7-3-4-M5_S5CLC	Mucosa	CG	9	256	993		O100:H30	0	0	0	0	0	0	0	0	0	0	0	1	0	0	0	TET	0	1	0	0	1	1	0	1	1	1	1	1	1	1	1	1	1	1	1	1	1	0	1	1	1
RKI3304	22-7-3-4-M7_S6CLC	Mucosa	CG	9	256	993		O100:H30	0	0	0	0	0	0	0	0	0	0	0	1	0	0	0	Susceptible	0	0	0	0	1	1	0	1	1	1	1	1	1	1	1	1	1	1	1	1	1	0	1	1	1
RKI4887	23-10-31-3-K11_S8CLC	Feces	HZG	16	256	10	ST10 Cplx	O8:H9	0	0	0	0	0	0	0	0	0	0	0	0	0	0	0	Susceptible	0	0	0	0	1	1	1	1	1	1	1	1	1	1	1	1	1	1	1	1	1	0	1	1	1
RKI4889	23-10-31-3-K13_S9CLC	Feces	HZG	16	256	10	ST10 Cplx	O unknown:H2	0	0	0	0	0	0	0	0	0	0	0	0	0	0	0	Susceptible	0	0	0	0	1	1	1	1	1	1	1	1	1	1	1	1	1	1	1	1	1	0	1	1	1
RKI4898	23-10-31-3-K22_S10CLC	Feces	HZG	16	256	10	ST10 Cplx	O unknown:H2	0	0	0	0	0	0	0	0	0	0	0	0	0	0	0	Susceptible	0	0	0	0	1	1	1	1	1	1	1	1	1	1	1	1	1	1	1	1	1	0	1	1	1
RKI4881	23-10-31-3-K5_S7CLC	Feces	HZG	16	256	58	ST155 Cplx	O unknown:H2	0	0	0	0	1	0	0	0	0	0	0	0	0	0	0	AMP/PIP	1	0	0	0	1	1	0	1	1	1	1	1	1	1	1	1	1	1	1	1	1	0	1	1	1
RKI4107	23-10-3-4-D13_S8CLC	Digesta	HZG	16	256	56	ST155 Cplx	O113:H21	1	0	0	0	0	0	0	1	0	0	0	0	0	0	0	Susceptible	0	0	0	0	1	1	0	1	1	1	1	1	1	1	1	1	1	1	1	1	1	0	1	1	1
RKI4098	23-10-3-4-D2_S6CLC	Digesta	HZG	16	256	154		O89:H38	0	0	0	0	0	0	0	0	0	0	0	0	0	0	0	Susceptible	0	0	0	0	1	1	1	1	1	1	1	1	1	1	1	1	1	1	1	1	1	0	1	1	1
RKI4100	23-10-3-4-D6_S7CLC	Digesta	HZG	16	256	154		O89:H38	0	0	0	0	0	0	0	0	0	0	0	0	0	0	0	Susceptible	0	0	0	0	1	1	1	1	1	1	1	1	1	1	1	1	1	1	1	1	1	0	1	1	1
RKI3355	23-10-3-4-M12_S12CLC	Mucosa	HZG	16	256	154		O89:H38	0	0	0	0	0	0	0	0	0	0	0	0	0	0	0	Susceptible	0	0	0	0	1	1	1	1	1	1	1	1	1	1	1	1	1	1	1	1	1	0	1	1	1
RKI3357	23-10-3-4-M14_S24CLC	Mucosa	HZG	16	256	154		O89:H38	0	0	0	0	0	0	0	0	0	0	0	0	0	0	0	Susceptible	0	0	0	0	1	1	1	1	1	1	1	1	1	1	1	1	1	1	1	1	1	0	1	1	1
RKI3361	23-10-3-4-M18_S25CLC	Mucosa	HZG	16	256	154		O89:H38	0	0	0	0	0	0	0	0	0	0	0	0	0	0	0	Susceptible	0	0	0	0	1	1	1	1	1	1	1	1	1	1	1	1	1	1	1	1	1	0	1	1	1
RKI3363	23-10-3-4-M20_S26CLC	Mucosa	HZG	16	256	56	ST155 Cplx	O113:H21	1	0	0	0	0	0	0	1	0	0	0	0	0	0	0	Susceptible	0	0	0	0	1	1	0	1	1	1	1	1	1	1	1	1	1	1	1	1	1	0	1	1	1
RKI3349	23-10-3-4-M6_S11CLC	Mucosa	HZG	16	256	154		O89:H38	0	0	0	0	0	0	0	0	0	0	0	0	0	0	0	Susceptible	0	0	0	0	1	1	1	1	1	1	1	1	1	1	1	1	1	1	1	1	1	0	1	1	1
RKI3943	23-1-2-4-D2_S13CLC	Digesta	CG	10	256	58	ST155 Cplx	O8:H25	0	0	0	0	0	0	0	0	0	0	0	0	0	0	0	Susceptible	0	0	0	0	1	1	0	1	1	1	1	1	1	1	1	1	1	1	1	1	1	0	1	1	1
RKI3160	23-1-2-4-M1_S9CLC	Mucosa	CG	10	256	34	ST10 Cplx	O62:H30	0	0	0	0	1	1	1	0	0	0	0	1	0	0	0	AMP/PIP/TET	1	1	0	0	1	1	1	1	1	1	1	1	1	1	1	1	2	1	1	1	1	0	1	1	1
RKI3169	23-1-2-4-M22_S11CLC	Mucosa	CG	10	256	58	ST155 Cplx	O8:H unknown	0	0	0	0	0	0	0	0	0	0	0	0	0	0	0	Susceptible	0	0	0	0	1	1	0	1	1	1	1	1	1	1	1	1	1	1	1	1	1	0	1	1	1
RKI3162	23-1-2-4-M9_S10CLC	Mucosa	CG	10	256	58	ST155 Cplx	O8:H25	0	0	0	0	0	0	0	0	0	0	0	0	0	0	0	Susceptible	0	0	0	0	1	1	0	1	1	1	1	1	1	1	1	1	1	1	1	1	1	0	1	1	1
RKI4838	23-1-31-3-K17_S21CLC	Feces	CG	10	256	10	ST10 Cplx	O84:H11	0	0	0	0	0	0	0	0	0	0	0	0	0	0	0	Susceptible	0	0	0	0	1	1	1	1	1	1	1	1	1	1	1	1	1	1	1	1	1	0	1	1	1
RKI6213	23-3-31-1-K11_S25CLC	Feces	CG	11	256	88	ST23 Cplx	O104:H10	0	0	0	0	0	0	0	0	0	0	0	0	0	0	0	Susceptible	0	0	0	0	1	1	1	1	1	1	1	1	1	1	1	1	1	1	1	1	1	1	1	1	1
RKI4082	23-3-3-4-D16_S18CLC	Digesta	CG	11	256	23	ST23 Cplx	O8:H9	0	0	0	0	0	0	0	0	0	0	0	0	0	0	0	Susceptible	0	0	0	0	1	1	2	1	1	1	2	1	1	1	1	1	1	1	1	1	1	0	1	1	1
RKI3285	23-3-3-4-M11_S4CLC	Mucosa	CG	11	256	40	ST40 Cplx	O39:H21	0	0	0	0	0	0	0	0	0	0	0	0	0	0	0	Susceptible	0	0	0	0	1	1	0	1	1	1	1	1	1	1	1	1	1	1	1	1	1	0	1	1	1
RKI3278	23-3-3-4-M2_S14CLC	Mucosa	CG	11	256	681		O8:H10	0	0	0	0	1	0	0	0	0	0	0	1	0	0	0	AMP/PIP/TET	1	1	0	0	1	1	1	1	1	1	1	1	1	1	1	1	2	1	1	1	1	0	1	1	1
RKI3283	23-3-3-4-M9_S34CLC	Mucosa	CG	11	256	88	ST23 Cplx	O8:H10	0	0	0	0	0	0	0	0	0	0	0	0	0	0	0	Susceptible	0	0	0	0	1	1	1	1	1	1	1	1	1	1	1	1	1	1	1	1	1	1	1	1	1
RKI3993	23-5-2-4-D1_S14CLC	Digesta	HZG	12	256	34	ST10 Cplx	O62:H30	0	0	0	0	1	1	1	0	0	0	0	1	0	0	0	AMP/PIP/TET	1	1	0	0	1	1	1	1	1	1	1	1	1	1	1	1	2	1	1	1	1	0	1	1	1
RKI4005	23-5-2-4-D17_S20CLC	Digesta	HZG	12	256	34	ST10 Cplx	O62:H30	0	0	0	0	1	1	1	0	0	0	0	1	0	0	0	AMP/PIP/TET	1	1	0	0	1	1	1	1	1	1	1	1	1	1	1	1	2	1	1	1	1	0	1	1	1
RKI3994	23-5-2-4-D2_S18CLC	Digesta	HZG	12	256	34	ST10 Cplx	O62:H30	0	0	0	0	1	1	1	0	0	0	0	1	0	0	0	AMP/PIP/TET	1	1	0	0	1	1	1	1	1	1	1	1	1	1	1	1	2	1	1	1	1	0	1	1	1
RKI4009	23-5-2-4-D21_S21CLC	Digesta	HZG	12	256	34	ST10 Cplx	O62:H30	0	0	0	0	1	1	1	0	0	0	0	1	0	0	0	AMP/PIP/TET	1	1	0	0	1	1	1	1	1	1	1	1	1	1	1	1	2	1	1	1	1	0	1	1	1
RKI3995	23-5-2-4-D3_S19CLC	Digesta	HZG	12	256	34	ST10 Cplx	O62:H30	0	0	0	0	1	1	1	0	0	0	0	1	0	0	0	AMP/PIP/TET	1	1	0	0	1	1	1	1	1	1	1	1	1	1	1	1	2	1	1	1	1	0	1	1	1
RKI3200	23-5-2-4-M1_S19CLC	Mucosa	HZG	12	256	34	ST10 Cplx	O62:H30	0	0	0	0	1	1	1	0	0	0	0	1	0	0	0	AMP/PIP/TET	1	1	0	0	1	1	1	1	1	1	1	1	1	1	1	1	2	1	1	1	1	0	1	1	1
RKI3213	23-5-2-4-M18_S3CLC	Mucosa	HZG	12	256	34	ST10 Cplx	O62:H30	0	0	0	0	1	1	1	0	0	0	0	1	0	0	0	AMP/PIP/TET	1	1	0	0	1	1	1	1	1	1	1	1	1	1	1	1	2	1	1	1	1	0	1	1	1
RKI3214	23-5-2-4-M19_S21CLC	Mucosa	HZG	12	256	34	ST10 Cplx	O62:H30	0	0	0	0	1	1	1	0	0	0	0	1	0	0	0	AMP/PIP/TET	1	1	0	0	1	1	1	1	1	1	1	1	1	1	1	1	2	1	1	1	1	0	1	1	1
RKI3217	23-5-2-4-M22_S12CLC	Mucosa	HZG	12	256	34	ST10 Cplx	O62:H30	0	0	0	0	1	1	1	0	0	0	0	1	0	0	0	AMP/PIP/TET	1	1	0	0	1	1	1	1	1	1	1	1	1	1	1	1	2	1	1	1	1	0	1	1	1
RKI3202	23-5-2-4-M3_S20CLC	Mucosa	HZG	12	256	34	ST10 Cplx	O62:H30	0	0	0	0	1	1	1	0	0	0	0	1	0	0	0	AMP/PIP/TET	1	1	0	0	1	1	1	1	1	1	1	1	1	1	1	1	2	1	1	1	1	0	1	1	1
RKI4855	23-5-31-3-K1_S21CLC	Feces	HZG	12	256	10	ST10 Cplx	O88:H12	1	0	1	0	1	1	1	0	0	1	1	0	0	0	0	AMP/PIP/TET/SXT	1	1	1	0	1	1	1	1	1	1	1	1	1	1	1	1	1	1	1	1	1	0	1	1	1
RKI4864	23-5-31-3-K10_S24CLC	Feces	HZG	12	256	10	ST10 Cplx	O88:H12	1	0	1	0	1	1	1	0	0	1	1	0	0	0	0	AMP/PIP/TET/SXT	1	1	1	0	1	1	1	1	1	1	1	1	1	1	1	1	1	1	1	1	1	0	1	1	1
RKI4865	23-5-31-3-K11_S29CLC	Feces	HZG	12	256	21	ST29 Cplx	O26:H11	0	0	0	0	0	0	0	0	0	0	0	0	0	0	0	Susceptible	0	0	0	0	1	1	0	1	1	1	1	1	1	1	1	1	1	1	1	1	1	1	1	1	1
RKI4867	23-5-31-3-K13_S25CLC	Feces	HZG	12	256	10	ST10 Cplx	O88:H12	1	0	1	0	1	1	1	0	0	1	1	0	0	0	0	AMP/PIP/TET/SXT	1	1	1	0	1	1	1	1	1	1	1	1	1	1	1	1	1	1	1	1	1	0	1	1	1
RKI4872	23-5-31-3-K18_S26CLC	Feces	HZG	12	256	10	ST10 Cplx	O88:H12	1	0	1	0	1	1	1	0	0	1	1	0	0	0	0	AMP/PIP/TET/SXT	1	1	1	0	1	1	1	1	1	1	1	1	1	1	1	1	1	1	1	1	1	0	1	1	1
RKI4856	23-5-31-3-K2_S22CLC	Feces	HZG	12	256	10	ST10 Cplx	O88:H12	1	0	1	0	1	1	1	0	0	1	1	0	0	0	0	AMP/PIP/TET/SXT	1	1	1	0	1	1	1	1	1	1	1	1	1	1	1	1	1	1	1	1	1	0	1	1	1
RKI4862	23-5-31-3-K8_S23CLC	Feces	HZG	12	256	10	ST10 Cplx	O88:H12	1	0	1	0	1	1	1	0	0	1	1	0	0	0	0	AMP/PIP/TET/SXT	1	1	1	0	1	1	1	1	1	1	1	1	1	1	1	1	1	1	1	1	1	0	1	1	1
RKI6214	23-6-31-3-K8_S5CLC	Feces	HZG	13	512	101	ST101 Cplx	O82:H8	0	0	0	0	0	0	0	0	0	0	0	0	0	0	0	Susceptible	0	0	0	0	1	1	0	1	1	1	1	1	1	1	1	1	1	1	1	1	1	0	1	1	1
RKI6215	23-6-31-3-K9_S6CLC	Feces	HZG	13	256	56	ST155 Cplx	O113:H21	1	0	0	0	0	0	0	1	0	0	0	0	0	0	0	Susceptible	0	0	0	0	1	1	0	1	1	1	1	1	1	1	1	1	1	1	1	1	1	0	1	1	1
RKI4160	23-6-3-4-D14_S4CLC	Digesta	HZG	13	256	154		O89:H38	0	0	0	0	0	0	0	0	0	0	0	0	0	0	0	Susceptible	0	0	0	0	1	1	1	1	1	1	1	1	1	1	1	1	1	1	1	1	1	0	1	1	1
RKI4166	23-6-3-4-D20	Digesta	HZG	13	512	101	ST101 Cplx	O82:H8	0	0	0	0	0	0	0	0	0	0	0	0	0	0	0	Susceptible	0	0	0	0	1	1	0	1	1	1	1	1	1	1	1	1	1	1	1	1	1	0	1	1	1
RKI3334	23-6-3-4-M10_S19CLC	Mucosa	HZG	13	512	101	ST101 Cplx	O82:H8	0	0	0	0	0	0	0	0	0	0	0	0	0	0	0	Susceptible	0	0	0	0	1	1	0	1	1	1	1	1	1	1	1	1	1	1	1	1	1	0	1	1	1
RKI3337	23-6-3-4-M13_S20CLC	Mucosa	HZG	13	256	154		O89:H38	0	0	0	0	0	0	0	0	0	0	0	0	0	0	0	Susceptible	0	0	0	0	1	1	1	1	1	1	1	1	1	1	1	1	1	1	1	1	1	0	1	1	1
RKI3340	23-6-3-4-M16_S21CLC.	Mucosa	HZG	13	512	101	ST101 Cplx	O82:H8	0	0	0	0	0	0	0	0	0	0	0	0	0	0	0	Susceptible	0	0	0	0	1	1	0	1	1	1	1	1	1	1	1	1	1	1	1	1	1	0	1	1	1
RKI3326	23-6-3-4-M2_S17CLC	Mucosa	HZG	13	256	154		O89:H38	0	0	0	0	0	0	0	0	0	0	0	0	0	0	0	Susceptible	0	0	0	0	1	1	1	1	1	1	1	1	1	1	1	1	1	1	1	1	1	0	1	1	1
RKI3343	23-6-3-4-M20_S22CLC	Mucosa	HZG	13	256	154		O89:H38	0	0	0	0	0	0	0	0	0	0	0	0	0	0	0	Susceptible	0	0	0	0	1	1	1	1	1	1	1	1	1	1	1	1	1	1	1	1	1	0	1	1	1
RKI3345	23-6-3-4-M22_S23CLC	Mucosa	HZG	13	256	10	ST10 Cplx	O9:H9	0	0	0	0	0	0	0	0	0	0	0	0	0	0	0	Susceptible	0	0	0	0	1	1	1	1	1	1	1	1	1	1	1	1	1	1	1	1	1	0	1	1	1
RKI3333	23-6-3-4-M9_S11CLC	Mucosa	HZG	13	256	56	ST155 Cplx	O113:H21	1	0	0	0	0	0	0	1	0	0	0	0	0	0	0	Susceptible	0	0	0	0	1	1	0	1	1	1	1	1	1	1	1	1	1	1	1	1	1	0	1	1	1
RKI3855	23-8-1-4-D16_S34CLC	Digesta	HZG	14	256	10	ST10 Cplx	O unknown:H2	0	0	0	0	0	0	0	0	0	0	0	0	0	0	0	Susceptible	0	0	0	0	1	1	1	1	1	1	1	1	1	1	1	1	1	1	1	1	1	0	1	1	1
RKI3857	23-8-1-4-D18_S35CLC	Digesta	HZG	14	512	3057		O98:H5	0	0	0	0	0	0	0	0	0	0	0	0	0	0	0	Susceptible	0	0	0	0	1	1	0	1	1	1	1	1	1	1	1	1	1	1	1	1	1	0	1	1	1
RKI3858	23-8-1-4-D19_S1CLC	Digesta	HZG	14	128	40	ST40 Cplx	O39:H21	0	0	0	0	0	0	0	0	0	0	0	0	0	0	0	Susceptible	0	0	0	0	1	1	0	1	1	1	1	1	1	1	1	1	1	1	1	1	1	0	1	1	1
RKI3860	23-8-1-4-D22_S2CLC	Digesta	HZG	14	256	3057		O98:H5	0	0	0	0	0	0	0	0	0	0	0	0	0	0	0	Susceptible	0	0	0	0	1	1	0	1	1	1	1	1	1	1	1	1	1	1	1	1	1	0	1	1	1
RKI3847	23-8-1-4-D4_S33CLC	Digesta	HZG	14	512	3057		O98:H5	0	0	0	0	0	0	0	0	0	0	0	0	0	0	0	Susceptible	0	0	0	0	1	1	0	1	1	1	1	1	1	1	1	1	1	1	1	1	1	0	1	1	1
RKI4816	23-8-31-3-K15_S16CLC	Feces	HZG	14	256	10	ST10 Cplx	O unknown:H2	0	0	0	0	0	0	0	0	0	0	0	0	0	0	0	Susceptible	0	0	0	0	1	1	1	1	1	1	1	1	1	1	1	1	1	1	1	1	1	0	1	1	1
RKI4019	23-9-2-4-D1_S22CLC	Digesta	HZG	15	256	34	ST10 Cplx	O62:H30	0	0	0	0	1	1	1	0	0	0	0	1	0	0	0	AMP/PIP/TET	1	1	0	0	1	1	1	1	1	1	1	1	1	1	1	1	2	1	1	1	1	0	1	1	1
RKI4035	23-9-2-4-D17_S3CLC	Digesta	HZG	15	256	154		O89:H38	0	0	0	0	0	0	0	0	0	0	0	0	0	0	0	Susceptible	0	0	0	0	1	1	1	1	1	1	1	1	1	1	1	1	1	1	1	1	1	0	1	1	1
RKI4021	23-9-2-4-D3_S23CLC	Digesta	HZG	15	256	34	ST10 Cplx	O62:H30	0	0	0	0	1	1	1	0	0	0	0	1	0	0	0	AMP/PIP/TET	1	1	0	0	1	1	1	1	1	1	1	1	1	1	1	1	2	1	1	1	1	0	1	1	1
RKI4022	23-9-2-4-D4_S24CLC	Digesta	HZG	15	512	10	ST10 Cplx	O182:H19	1	0	1	0	0	0	0	1	0	1	1	0	0	0	0	TET/SXT	0	1	1	0	1	1	1	1	1	1	2	1	1	1	1	1	1	1	1	1	1	1	1	1	1
RKI3234	23-9-2-4-M14_S16CLC	Mucosa	HZG	15	512	154		O89:H38	0	0	0	0	0	0	0	0	0	0	0	0	0	0	0	Susceptible	0	0	0	0	1	1	0	1	1	1	1	1	1	1	1	1	1	1	1	1	1	0	1	1	1
RKI3226	23-9-2-4-M5_S22CLC	Mucosa	HZG	15	256	34	ST10 Cplx	O62:H30	0	0	0	0	1	1	1	0	0	0	0	1	0	0	0	AMP/PIP/TET	1	1	0	0	1	1	1	1	1	1	1	1	1	1	1	1	2	1	1	1	1	0	1	1	1
RKI3228	23-9-2-4-M8_S23CLC	Mucosa	HZG	15	256	34	ST10 Cplx	O62:H30	0	0	0	0	1	1	1	0	0	0	0	1	0	0	0	AMP/PIP/TET	1	1	0	0	1	1	1	1	1	1	1	1	1	1	1	1	2	1	1	1	1	0	1	1	1
RKI4947	23-9-31-3-K1_S27CLC	Feces	HZG	15	256	34	ST10 Cplx	O62:H30	0	0	0	0	1	1	1	0	0	0	0	1	0	0	0	AMP/PIP/TET	1	1	0	0	1	1	1	1	1	1	1	1	1	1	1	1	2	1	1	1	1	0	1	1	1
RKI6216	23-9-31-3-K19_S30CLC	Feces	HZG	15	512	154		O89:H38	0	0	0	0	0	0	0	0	0	0	0	0	0	0	0	Susceptible	0	0	0	0	1	1	1	1	1	1	1	1	1	1	1	1	1	1	1	1	1	0	1	1	1
RKI4948	23-9-31-3-K2_S28CLC	Feces	HZG	15	256	10	ST10 Cplx	O88:H12	1	0	1	0	1	1	1	0	0	1	1	0	0	0	0	AMP/PIP/TET/SXT	1	1	1	0	1	1	1	1	1	1	1	1	1	1	1	1	1	1	1	1	1	0	1	1	1
RKI6217	23-9-31-3-K22_S4CLC	Feces	HZG	15	256	154		O89:H38	0	0	0	0	0	0	0	0	0	0	0	0	0	0	0	Susceptible	0	0	0	0	1	1	1	1	1	1	1	1	1	1	1	1	1	1	1	1	1	0	1	1	1
RKI4949	23-9-31-3-K3_S29CLC	Feces	HZG	15	256	34	ST10 Cplx	O62:H30	0	0	0	0	1	1	1	0	0	0	0	1	0	0	0	AMP/PIP/TET	1	1	0	0	1	1	1	1	1	1	1	1	1	1	1	1	2	1	1	1	1	0	1	1	1
RKI6122	RS0951 (Referenz)				1024	617	ST10 Cplx	O unknown:H10	1	1	0	0	0	1	1	0	1	1	1	1	0	0	1	TET/ERFX	0	1	0	1	1	1	1	1	1	1	1	1	1	1	1	1	1	1	1	1	1	0	0	1	1
[truncated: 296 more columns]
